1 **Full title**

2 Plasmid characterization in bacterial isolates of public health relevance in a tertiary healthcare  
3 facility in Kilimanjaro, Tanzania

4 **Short title**

5 Plasmids characterization and public health relevance

6 **Authors**

7 Lameck Pashet Sengeruan <sup>1, 2, \*</sup> (LP), Marco van Zwetselaar <sup>3</sup> (MvZ), Happiness Kumburu <sup>3</sup> (HK),  
8 Frank M. Aarestrup <sup>4</sup> (FM), Katharina Kreppel <sup>1</sup> (KK), Elingarami Sauli <sup>1</sup> (ES), Tolbert Sonda <sup>3</sup> (TS)

9 **Affiliations**

10 <sup>1</sup> School of Life Science and Bioengineering, The Nelson Mandela African Institution of Science  
11 and Technology, Arusha, Tanzania.

12 <sup>2</sup> Training and Capacity Building Department, Ifakara Health Institute, Bagamoyo, Tanzania.

13 <sup>3</sup> Genomics and Bioinformatics unit, Kilimanjaro Clinical Research Institute, Moshi, Tanzania

14 <sup>4</sup> DTU-Food, Technical University of Denmark

15 \* Corresponding author

16 E-mail: [lpashet@ihi.or.tz](mailto:lpashet@ihi.or.tz)/ [lameckpashet@gmail.com](mailto:lameckpashet@gmail.com) (LP)

17

18

## 19 Abstract

20 Plasmids are infectious double stranded DNA molecules that are found within bacteria. Horizontal  
21 gene transfer promotes successful spread of different types of plasmids within or among bacteria  
22 species, making their detection an important task for guiding clinical treatment. We used whole  
23 genome sequenced data to determine the prevalence of plasmid replicons in clinical bacterial  
24 isolates, the presence of resistance and virulence genes in plasmids, and the relationship between  
25 resistance and virulence genes within each plasmid. All bacterial sequences were de novo  
26 assembled using Unicycler before extraction of plasmids. Assembly graphs were submitted to  
27 Gplas+plasflow for plasmid prediction. The predicted plasmid components were validated using  
28 PlasmidFinder.

29 A total of 159 (56.2%) out of 283 bacterial isolates were found to carry plasmids, with *E. coli*, *K.*  
30 *pneumoniae* and *S. aureus* being the most prevalent plasmid carriers. A total of 27 (87.1%)  
31 combined plasmids were found to carry both resistance and virulence genes compared to 4 (12.9%)  
32 single plasmids. No statistically significant correlation was found between the number of  
33 antimicrobial resistance and virulence genes in plasmids ( $r = -0.25$ ,  $p > 0.05$ ). Our findings show a  
34 relatively high proportion of plasmid-carrying isolates suggesting selection pressure due to  
35 antibiotic use in the hospital. Co-occurrence of antibiotic resistance and virulence genes in clinical  
36 isolates is a public health relevant problem needing attention.

37 **Keywords:** whole genome sequencing; plasmids; antibiotic resistance; virulence; public health,  
38 Tanzania

39

40

## 41 **Introduction**

42 Plasmids are circular, double-stranded DNA molecules that occur naturally in bacterial cells [1],  
43 whose genes often provide evolutionary advantages for bacteria, such as antimicrobial resistance  
44 and/or virulence [2,3]. Plasmids are important vehicles in disseminating and acquiring antibiotic  
45 resistance and virulence, and can thus constitute a major burden on human health [4]. Recent  
46 studies have suggested that the prevalence of antimicrobial resistance (AMR) is higher in Low- and  
47 Middle-income Countries (LMICs) compared to European countries and the United States [5,6].  
48 There is however, limited knowledge regarding the dissemination of antibiotic resistance genes  
49 (ARGs) and virulence among clinical isolates in Sub-Saharan Africa (SSA). This study was  
50 conducted to determine the proportion of bacterial isolates carrying plasmids, to identify plasmids  
51 that mediate resistance and virulence genes, and to investigate the relationship between  
52 antimicrobial resistance genes and virulence genes within plasmids using whole genome sequence  
53 data from bacterial isolates among inpatients at Kilimanjaro Christian Medical Centre (KCMC) in  
54 Tanzania.

## 55 **Materials and methods**

### 56 **Study setting, Whole-genome sequencing and library preparation**

57 Kilimanjaro Christian Medical Centre (KCMC) is one of Tanzania's five zonal referral hospitals,  
58 located in Moshi, northern Tanzania. KCMC has a bed capacity of 650 and serves a catchment area  
59 of about 15 million people. It serves around 500 outpatients daily, from different parts of Tanzania

60 [7]. The whole genome sequence data that was analyzed originated from a prospective cross-  
61 sectional study that was conducted at KCMC between August 2013 and August 2015. In this study,  
62 a total of 56 stool, 122 sputum, 126 blood and 286 wound swabs (wound/pus) clinical samples,  
63 with patients' clinical and socio-demographic characteristics, were collected from 575 patients  
64 admitted to KCMC hospital [8,9]. A written informed consent was obtained from each participant  
65 and from parents or guardians of children before enrolled into the study.

66 Collected specimens were taken to the microbiology unit at Kilimanjaro Clinical Research Institute  
67 (KCRI) for culture and identification of bacterial isolates. Out of 590 specimens collected, 249  
68 were culture positive, resulting in 377 isolates [8]. All bacterial isolates were sequenced in the  
69 KCRI genomics lab, and all sequences were archived on the KCRI compute cluster. In brief, whole  
70 genome sequencing (WGS) was performed for genomic DNA that was extracted from cultures of  
71 bacterial isolates using the Easy-DNA Extraction Kit (Invitrogen®). Short-read WGS was  
72 performed using the Illumina MiSeq platform (Illumina Inc.). Libraries for Illumina sequencing  
73 were constructed using the Illumina Nextera XT kit (Illumina Ltd., San Diego, CA, USA)  
74 according to the manufacturer's recommendations. The libraries were sequenced on Illumina  
75 MiSeq platform using the 2 x 250bp paired-end protocol, previously reported by Kumburu et al  
76 [8] & Sonda et al [9]. For the purpose of this study, a total of 283 bacterial whole genomes isolates  
77 with associated metadata were retrieved for analysis. Additional ethical approval was obtained from  
78 the Ifakara Health Institute Research Ethics Committee (IHI/IRB/No: 14-2021) for plasmid  
79 characterization.

80

81

## 82 **Bioinformatics Analyses**

### 83 **Quality Control and Trimming of Illumina Sequences**

84 The following steps were followed: (i) All bacterial raw reads were submitted to in-house bacterial  
85 analysis pipeline (BAP), available at <https://github.com/zwets/kcri-cge-bap>. Assembly was  
86 performed using SKESA 2.4.0 [10]. (ii) All resulting assemblies were then processed in batch by  
87 the Genome Taxonomy Database Toolkit (GTDB-Tk) 0.3.2 [11] for detailed taxonomic  
88 assignment. (iii) Metrics produced by the BAP and GTDB-Tk were then used to assess the quality  
89 of each assembly. Assessment was based on read counts, coverage depth, assembly structure  
90 (contig count, N1, N50, L50), deviation of assembly length from reference, GTDB alignment  
91 fraction, and GTDB Multi-Locus Sequence Alignment (MSA) coverage. A six-point scale was used  
92 for assembly quality rating: 0 (Unusable), 1 (Mix), 2 (Bad), 3 (Usable), 4 (Good), and 5 (Excellent).  
93 (iv) Finally, categories 0 to 2 were excluded, while categories 3 through 5 were used for subsequent  
94 analysis. Every assembly in these categories was for a single isolate that had (nearly) complete  
95 genome coverage, at sufficient sequencing depth.

### 96 **Plasmid extraction and validation**

97 Raw reads assembly was repeated with Unicycler 0.4.7 [12] for its ability as a “SPAdes optimiser”  
98 to produce long and, in the ideal case, circular contigs. Assembly graphs (GFA) were submitted to  
99 Gplas+plasflow for plasmid prediction. Gplas 0.6.1 [13] + Plasflow 1.1 [14] take into account the  
100 connected components in the assembly graph when predicting plasmids. The components predicted  
101 to be plasmids were extracted from the assemblies and submitted to PlasmidFinder version 1.3 [15]  
102 for validation.

## 103 **Identification of Plasmid-Mediated Antibiotic Resistance Genes (ARGs) and** 104 **Virulence genes**

105 To identify antibiotic resistance and virulence genes carried in plasmids, the assembled putative  
106 plasmid sequences for each isolate were submitted to Resfinder 4.0 [16] and VirulenceFinder  
107 1.4[17] respectively. In both Resfinder and VirulenceFinder, 90% identity and 60% coverage  
108 settings to call a gene were selected.

## 109 **Statistical analysis**

110 Stata 14 (College Station, TX, 77845, USA) was used for descriptive statistics and determination of  
111 the relationship between antimicrobial resistance and virulence genes in plasmids.

## 112 **Results**

### 113 **Study population**

114 In total, 128 patients whose whole genome bacterial isolates were analyzed were included in this  
115 study (Table 1). One-hundred twenty eight patients were plasmid positive isolates. The mean age in  
116 years (SD) was 46.2 (18.0). Male patients were 77 (60.2%), females were 47 (36.7%) and 4 (3.1%)  
117 missed gender identification. A total of 62 (48.4%) patients were admitted to surgical ward, 9  
118 (7.1%) surgical ICU, 52 (40.6%) medical ward, 4 (3.1%) medical ICU ward, and 1 (0.8%) missed  
119 ward admission identification. Eighty-seven (67.9%) specimens were swabs, 19 (14.8%) were  
120 stool, 13 (10.2%) were sputum, 8 (6.3%) were blood and 1(0.8%) specimen missed identification.  
121 A total of 28 (21.9%) patients were diabetic, 6 (4.7%) were cancer patients, 6 (4.7%) were suffering  
122 from TB, 2 (1.5%) were HIV positive and 86 (67.2%) were others: Of those 61 (47.7%) had no

123 underlying conditions and 25 (19.5%) had other underlying conditions. Of the wound swabs,  
124 twenty-four (18.8%) were from patients with diabetic wounds, 11 (8.6%) were from burn wounds,  
125 10 (7.8%) were from post-surgical wounds, 6 (4.6%) were from motor traffic accidents wounds and  
126 77 (60.2%) were others: Of those 35 (27.3%) other wounds and 42 (32.8%) had no wounds.

127 Seventy-eight (60.9%) patients had no history of hospitalization, 42 (32.8%) had hospitalization  
128 history and 8 (6.3%) missed identification. A total of 81 (63.3%) patients were transferred from  
129 another hospital, 44 (34.4%) were not and 3 (2.3%) missed identification. Among all participants,  
130 the median number of days stayed in the hospital before the survey was 8 days (Table 1).

131

132

133

134

135

136

137

138

139

140

141

142 **Table 1. Demographic and clinical characteristics of patients that samples were taken from**

| Patient characteristics                                        | Missing <sup>a</sup> | Total (%)   |
|----------------------------------------------------------------|----------------------|-------------|
| Number of patients                                             |                      | 128 (100)   |
| Mean age in years (SD)                                         |                      | 46.2 (18.0) |
| Gender                                                         | 4 (3.1)              |             |
| Female                                                         |                      | 47 (36.7)   |
| Male                                                           |                      | 77 (60.2)   |
| Ward of admission                                              | 1 (0.8)              |             |
| Surgical                                                       |                      | 62 (48.4)   |
| Surgical ICU                                                   |                      | 9 (7.1)     |
| Medical                                                        |                      | 52 (40.6)   |
| Medical ICU                                                    |                      | 4 (3.1)     |
| Specimen collected                                             | 1 (0.8)              |             |
| Blood                                                          |                      | 8 (6.3)     |
| Sputum                                                         |                      | 13 (10.2)   |
| Stool                                                          |                      | 19 (14.8)   |
| Swab                                                           |                      | 87 (67.9)   |
| Underlying conditions                                          |                      |             |
| Cancer                                                         |                      | 6 (4.7)     |
| Diabetes                                                       |                      | 28 (21.9)   |
| HIV                                                            |                      | 2 (1.5)     |
| TB                                                             |                      | 6 (4.7)     |
| Others                                                         |                      | 86 (67.2)   |
| Type of wound                                                  |                      |             |
| Burn wound                                                     |                      | 11 (8.6)    |
| Diabetic wound                                                 |                      | 24 (18.8)   |
| Motor traffic wound                                            |                      | 6 (4.6)     |
| Post-surgical wound                                            |                      | 10 (7.8)    |
| Others                                                         |                      | 77 (60.2)   |
| History of hospitalization                                     | 8 (6.3)              |             |
| No                                                             |                      | 78 (60.9)   |
| Yes                                                            |                      | 42 (32.8)   |
| Patient hospital transfer                                      | 3 (2.3)              |             |
| No                                                             |                      | 44 (34.4)   |
| Yes                                                            |                      | 81 (63.3)   |
| Patient ward transfer                                          | 5 (3.9)              |             |
| No                                                             |                      | 110 (85.9)  |
| Yes                                                            |                      | 13 (10.2)   |
| Median time in days stayed in the hospital before survey (IQR) | 8 (6.3)              | 8 (4-11.5)  |

143 SD, standard deviation; ICU, intensive care unit; IQR, interquartile range; Missing <sup>a</sup>, were the missing values  
144 in each variable.



145

## 146 **Proportion of bacterial species carrying plasmids**

147 A total of 283 whole genome bacterial sequences were analyzed. One hundred fifty-nine (56.2%)  
148 bacterial isolates were detected to carry plasmids. Out of 159 plasmids, 94 non-repetitive plasmids  
149 were predicted. Of 94 plasmids, 48 (51.1%) were single plasmids and 46 (48.9%) were combined  
150 plasmids (two or more recombined plasmids). *K. pneumoniae* isolates were the most carriers of  
151 combined plasmids (17, 28.3%), followed by *S. aureus* (15, 25.0%) and *E.coli* (15, 25.0%). *E.coli*  
152 isolates were the most single plasmid carriers (23, 23.2%), followed by *S. aureus* (15, 15.2%) and  
153 *P. mirabilis* (14,14.4%) (Table 2).

154

155

156

157

158

159

160

161

162

163

164 **Table 2. Proportion of bacterial isolates carrying plasmids**

| Species                            | Isolates |      | Plasmids |                       |
|------------------------------------|----------|------|----------|-----------------------|
|                                    | N        | %    | Single   | Combined <sup>b</sup> |
| <i>Enterobacter asburiae</i>       | 1        | 0.6  | 1        | 0                     |
| <i>Enterobacter cloacae</i>        | 3        | 1.9  | 1        | 2                     |
| <i>Enterobacter hormaechei</i>     | 10       | 6.3  | 6        | 4                     |
| <i>Enterobacter kobei</i>          | 1        | 0.6  | 0        | 1                     |
| <i>Enterobacter roggkampii</i>     | 1        | 0.6  | 1        | 0                     |
| <i>Enterobacter soli</i>           | 1        | 0.6  | 1        | 0                     |
| <i>Enterobacter sp. n18-03635</i>  | 1        | 0.6  | 1        | 0                     |
| <i>Enterococcus faecalis</i>       | 7        | 4.4  | 5        | 2                     |
| <i>Enterococcus faecium</i>        | 3        | 1.9  | 2        | 1                     |
| <i>Enterococcus gallinarum</i>     | 1        | 0.6  | 1        | 0                     |
| <i>Escherichia coli</i>            | 38       | 23.9 | 23       | 15                    |
| <i>Klebsiella Michiganensis</i>    | 2        | 1.3  | 1        | 1                     |
| <i>Klebsiella oxytoca</i>          | 2        | 1.3  | 1        | 1                     |
| <i>Klebsiella pneumoniae</i>       | 25       | 15.7 | 8        | 17                    |
| <i>Klebsiella variicola</i>        | 2        | 1.3  | 2        | 0                     |
| <i>Micrococcus sp. Kbs0714</i>     | 1        | 0.6  | 1        | 0                     |
| <i>Morganella morganii</i>         | 4        | 2.5  | 4        | 0                     |
| <i>Proteus columbae</i>            | 1        | 0.6  | 1        | 0                     |
| <i>Proteus mirabilis</i>           | 14       | 8.8  | 14       | 0                     |
| <i>Proteus penneri</i>             | 1        | 0.6  | 1        | 0                     |
| <i>Proteus vulgaris</i>            | 1        | 0.6  | 1        | 0                     |
| <i>Pseudomonas aeruginosa</i>      | 2        | 1.3  | 2        | 0                     |
| <i>Shewanella algae</i>            | 1        | 0.6  | 1        | 0                     |
| <i>Staphylococcus aureus</i>       | 30       | 18.9 | 15       | 15                    |
| <i>Staphylococcus capitis</i>      | 1        | 0.6  | 1        | 0                     |
| <i>Staphylococcus epidermidis</i>  | 1        | 0.6  | 1        | 0                     |
| <i>Staphylococcus haemolyticus</i> | 3        | 1.9  | 3        | 0                     |
| <i>Staphylococcus hominis</i>      | 1        | 0.6  | 0        | 1                     |

165 N, total number of isolates/plasmids; combined<sup>b</sup>, two or more plasmids merged or fused together.

166

167

168

## 169 **Plasmids concurrently mediating resistance and virulence genes**

170 A total of 31 plasmids were identified to carry both resistance and virulence genes, of which 27  
171 (87.1%) were combined plasmids and 4 (12.9%) were single plasmids (Tables 3 and 4). All four  
172 single plasmids were carried by *E. coli*. Resistance gene *SulI* was found the most common across  
173 three single plasmids IncFII, IncQ1 and IncFII(pRSB107). Virulence genes *iucC* and *iutA* were also  
174 seen the most common across three single plasmids such as IncQ1, IncFII(pRSB107) and IncFIA  
175 (Table 3).

176 Among the 27 combined plasmids, 12 (44.4%) were carried by *E.coli* isolates, 10 (37.1%) by *K.*  
177 *pneumoniae* isolates, 2 (7.4%) by *E. hormaechei* isolates, 1 (3.7%) by *E. cloacae* isolate, 1(3.7%)  
178 by *K. oxytoca* isolate and 1 (3.7%) by *K. michiganensis* isolate. Virulence gene *traT* was seen in 19  
179 (70.4%) of the 27 combined plasmids, followed by *terC* which was identified in 7 (25.9%)  
180 plasmids. Resistance genes in combined plasmids, *sul2* was observed in 17 (62.9%) plasmids,  
181 followed by *blaTEM-1B* in 15 (55.6%) plasmids, followed by *blaCTX-M-15* in 14 (51.9%)  
182 plasmids and *blaOXA-1* in 13 (48.1%) plasmids (Table 4).

183

184 **Table 3. Single plasmids mediating both resistance and virulence genes**

| Single plasmids | Resistance genes                                            | Virulence genes                                                                       |
|-----------------|-------------------------------------------------------------|---------------------------------------------------------------------------------------|
| IncFII          | <i>aac(3)-IIa,aadA5,blaCTX-M-15,dfrA17,qacE,sul1,tet(B)</i> | <i>traT</i>                                                                           |
| IncQ1           | <i>aph(3'')-Ib,aph(6)-Id,blaTEM-1B,dfrA7,qacE,sul1,sul2</i> | <i>cea,focCsfA,focG,focI,iha,ireA,iucC,iutA,mchB,mchC,mchF,mcmA,papA_F48,papC,sat</i> |
| IncFIA          | <i>sitABCD,tet(A)</i>                                       | <i>iucC,iutA,sitA</i>                                                                 |
| IncFII(pRSB107) | <i>dfrA5,qacE,sul1,sul2</i>                                 | <i>capU,iroN,iss,iucC,iutA,mchB,mchC,mchF,mcmA,vat</i>                                |

185

186

187

188

189

190

191

192

193

194

195

196

197

198

199

200

201 **Table 4. Combined plasmids mediating both resistance and virulence genes**

| Combined plasmid                                              | Resistance genes                                                                                                                       | Virulence genes                                            |
|---------------------------------------------------------------|----------------------------------------------------------------------------------------------------------------------------------------|------------------------------------------------------------|
| IncFIB(K),IncFII(pKP91),IncR                                  | <i>ARR-2,aac(3)-IIa,aac(6')-Ib-cr,aadA1,aph(3'')-Ib,aph(6)-Id,blaCTX-M-15,blaOXA-1,catB3,cmlA1,dfrA14,ere(A),qacE,sul1,sul2,tet(A)</i> | <i>traT</i>                                                |
| IncFIB(K)(pCAV1099-114),IncHI2,IncHI2A,IncX3                  | <i>aac(6')-Ib-cr,aadA5,aph(3'')-Ib,aph(6)-Id,blaCTX-M-15,blaOXA-1,blaTEM-1B,catB3,dfrA17,qacE,qnrB1,sul1,sul2,tet(A),tet(B)</i>        | <i>terC</i>                                                |
| Col156,IncFIA,IncFIB(AP001918),IncFII(pRSB107)                | <i>aac(3)-IIa,aac(6')-Ib-cr,aadA5,aph(3'')-Ib,aph(6)-Id,blaCTX-M-15,blaOXA-1,catB3,dfrA17,mph(A),qacE,sul1,sul2,tet(A)</i>             | <i>hra,ihA,iucC,iutA,sat,senB,traT</i>                     |
| IncFIB(K),IncFII(K),IncQ1,IncR                                | <i>ARR-2,aac(3)-IIa,aadA1,aph(3'')-Ib,aph(3')-Ia,aph(6)-Id,blaCTX-M-15,blaTEM-1B,cmlA1,ere(A),qacE,qnrB1,sul1,sul2</i>                 | <i>traT</i>                                                |
| IncFIA(HI1),IncFIB(K),IncFII(Yp),IncHI2,IncHI2A,IncN3,pKP1433 | <i>aac(3)-IIa,aac(6')-Ib-cr,aph(3'')-Ib,aph(6)-Id,blaCTX-M-15,blaOXA-1,blaTEM-1B,catB3,qacE,qnrB1,sul1,sul2,tet(A)</i>                 | <i>terC</i>                                                |
| IncFIB(K),IncFII(K)                                           | <i>aac(3)-IIa,aac(6')-Ib-cr,aph(3'')-Ib,aph(6)-Id,blaCTX-M-15,blaOXA-1,blaTEM-1B,catB3,dfrA14,qnrB1,sul2,tet(A)</i>                    | <i>traT</i>                                                |
| IncHI2,IncHI2A                                                | <i>aac(3)-IIa,aac(6')-Ib-cr,aph(3'')-Ib,aph(6)-Id,blaCTX-M-15,blaOXA-1,blaTEM-1B,catB3,dfrA14,qnrB1,sul2,tet(A)</i>                    | <i>terC</i>                                                |
| Col156,IncFIA,IncFIB(AP001918),IncFII                         | <i>aac(3)-IIa,aac(6')-Ib-cr,aadA5,blaCTX-M-15,blaOXA-1,catB3,dfrA17,mph(A),qacE,sitABCD,sul1,tet(A)</i>                                | <i>capU,fyuA,irp2,iucC,iutA,senB,sitA,traT</i>             |
| IncFIB(pECLA),IncFII(pECLA),IncHI2,IncHI2A                    | <i>aac(3)-IIa,aac(6')-Ib-cr,aph(3'')-Ib,aph(6)-Id,blaCTX-M-15,blaOXA-1,catB3,dfrA14,qnrB1,sul2,tet(A)</i>                              | <i>terC</i>                                                |
| Col156,IncFIA,IncFIB(AP001918)                                | <i>aac(6')-Ib-cr,aadA5,blaCTX-M-15,blaOXA-1,catB3,dfrA17,mph(A),qacE,sitABCD,sul1,tet(A)</i>                                           | <i>iucC,iutA,senB,sitA,traT</i>                            |
| IncFIA,IncFIB(AP001918)                                       | <i>aac(3)-IIa,aac(6')-Ib-cr,aadA5,blaCTX-M-15,blaOXA-1,catB3,dfrA17,qacE,sitABCD,sul1</i>                                              | <i>fyuA,irp2,iucC,iutA,sitA,traT</i>                       |
| IncFIA,IncFII                                                 | <i>aac(6')-Ib-cr,aadA5,blaCTX-M-15,blaOXA-1,catB3,dfrA17,mph(A),qacE,sul1,tet(A)</i>                                                   | <i>afaA,afaC,afaD,ihA,iucC,iutA,nfaE,papA_F43,sat,traT</i> |
| IncFIA,IncFIB(AP001918),IncFII(pAM A1167-NDM-5)               | <i>aac(3)-IIa,aadA2,blaTEM-1B,catA1,dfrA12,mph(A),qacE,qepA4,sul1</i>                                                                  | <i>traT</i>                                                |

202  
203  
204  
205  
206  
207  
208

209 **Table 4. Continued**

|                                                |                                                                                             |                                                                                |
|------------------------------------------------|---------------------------------------------------------------------------------------------|--------------------------------------------------------------------------------|
| IncFIA(HI1),IncFIB(K),IncFII(pKP91),IncR       | <i>aac(6')-Ib-cr,aph(3'')-Ib,aph(6)-Id,blaCTX-M-15,blaOXA-1,blaTEM-1B,catB3,dfrA14,sul2</i> | <i>traT</i>                                                                    |
| IncFIA,IncFIB(AP001918),IncFII                 | <i>aac(6')-Ib-cr,aadA5,blaOXA-1,catB3,dfrA17,qacE,sul1,tet(B)</i>                           | <i>traT</i>                                                                    |
| IncFIB(K),IncFII(K),IncQ1                      | <i>aph(3'')-Ib,aph(3')-Ia,aph(6)-Id,blaTEM-1B,dfrA14,mph(A),sul2</i>                        | <i>traT</i>                                                                    |
| Col156,IncFIB(AP001918),IncFII                 | <i>aph(3'')-Ib,aph(6)-Id,blaTEM-1B,catA1,dfrA7,sul2,tet(D)</i>                              | <i>afaA,afaB,afaC,afaD,afaE,hra,iha,iss,iucC,iutA,papA_F43,sat,senB,traT</i>   |
| Col156,IncFIA,IncFIB(AP001918),IncQ1           | <i>aph(3'')-Ib,aph(6)-Id,blaTEM-1B,dfrA17,sul2,tet(B)</i>                                   | <i>iha,iucC,iutA,papA_F43,sat,senB</i>                                         |
| IncFIB(K)(pCAV1099-114),IncHI1B(pNDM-MAR)      | <i>aph(3'')-Ib,aph(6)-Id,dfrA15,qacE,sul1,sul2</i>                                          | <i>terC</i>                                                                    |
| IncFIB(K),IncFII(K),IncR                       | <i>aac(3)-IId,blaCTX-M-15,blaTEM-1B,dfrA30,sul2</i>                                         | <i>traT</i>                                                                    |
| IncFIB(K)(pCAV1099-114),IncHI1B(pNDM-MAR),IncR | <i>blaTEM-1B,dfrA5,qacE,sul1,tet(D)</i>                                                     | <i>fyuA,irp2,traT</i>                                                          |
| IncFII(K),IncR                                 | <i>aac(3)-IId,blaCTX-M-15,blaTEM-1B,dfrA30,sul2</i>                                         | <i>traT</i>                                                                    |
| IncFIB(AP001918),IncFII,IncQ1                  | <i>aph(3'')-Ib,aph(6)-Id,blaTEM-1B,dfrA5,sul2</i>                                           | <i>cia,cvaC,etsC,hlyF,ireA,iron,iss,iucC,iutA,mchF,ompT,papA_F11,papC,traT</i> |
| IncFIB(K)(pCAV1099-114),IncY                   | <i>sul2,tet(D)</i>                                                                          | <i>terC</i>                                                                    |
| IncFIB(AP001918),IncFII                        | <i>dfrA5</i>                                                                                | <i>cia,cvaC,etsC,hlyF,ireA,iron,iss,mchF,ompT,papA_F11,papC,traT</i>           |
| IncFIB(pHCM2),IncHI2,IncHI2A                   | <i>blaTEM-1B</i>                                                                            | <i>terC</i>                                                                    |
| IncFIB(pB171),IncFII(pCoo)                     | <i>mdf(A)</i>                                                                               | <i>eae,espA,espF,nleB,nleC,perA,tir,traT</i>                                   |

## 210 **Correlation between antimicrobial resistance and virulence genes**

211 We explored the relationship between the number of antibiotic resistance genes and virulence genes  
212 in 27 combined plasmids using Pearson correlation. There was an inconclusive negative  
213 relationship between antibiotic resistance and virulence genes existence in plasmids ( $r = -0.25$ ,  $p >$   
214  $0.05$ ).

## 215 **Discussion**

216 In the present study a high proportion of clinical bacterial isolates from inpatients at KCMC  
217 hospital was found to carry plasmids. The present findings are in concordance with previous  
218 studies elsewhere [18]. The observed high carriage of plasmids by the analyzed isolates might  
219 plausibly be a reflection of resistance selection pressure due to high antibiotic exposure in hospital  
220 settings [19].

221 *E. coli* isolates were the most prevalent carriers of single plasmids followed by *S. aureus* and *P.*  
222 *mirabilis*. On other hand, *K. pneumoniae* were the most prevalent carriers of combined plasmids,  
223 followed by *S. aureus* and *E. coli*. The present study findings are in line with a study results in a  
224 tertiary care hospital in south India [18]. Possible explanation could be that the mentioned bacterial  
225 species have great medical relevance and thus are relatively highly isolated in hospital settings  
226 compared to other species [20,21]. However, the present study findings show a larger proportion of  
227 *P. mirabilis* carrying plasmids than the study in south India. This difference might be due to the fact  
228 that majority of the present study isolates were from wound specimens in which *P. mirabilis* were  
229 identified [22,23].

230 This study identified bacterial species with low plasmid prevalence including *Enterobacter sp. n18-*  
231 *03635*, *Enterobacter kobei*, *Klebsiella variicola* and *Klebsiella oxytoca*. The study findings are  
232 consistent with other studies conducted in Canada, Greece and Mexico [24–26]. Interestingly, the  
233 study observed other low plasmid prevalence species that were reported elsewhere in soil samples,  
234 fish flesh samples [27–29] and pigeon flesh specimens [30] such as *Micrococcus sp. Kbs0714*,  
235 *Enterobacter soli* and *Proteus columbae*. The observed species with low plasmid prevalence might  
236 be due to rarity and in most cases misidentification [31,32]. However, reports of bacterial species  
237 with low plasmid indicates the possible emerging and transmission of bacterial pathogens in  
238 humans both in community and hospital settings [33].

239 Contrary to previous studies reporting IncF plasmid group in *E.coli* to carry resistance and  
240 virulence genes often [34] the present study, however shows IncQ1 carried the highest number of  
241 both resistance and virulence genes in *E.coli*, but the finding is in line with study conducted in  
242 Brazil [35,36]. This is possibly due to the fact that IncQ1 plasmids have high-level mobility,  
243 stability, replication at high copy number and transferred in wide range of bacterial species through  
244 conjugative plasmids [37–40].

245 In this study it was also identified that there are different combined plasmids ranging from two to  
246 seven plasmids. This is probably an indicative of bacterial evolution to adapt and thrive in hospitals  
247 where they are excessively exposed to antimicrobials, antiseptics and disinfectants [41–43]. A  
248 similar distribution of some combined plasmids in other regions carrying similar or different  
249 antibiotic resistance and virulence genes was noted in the present study. This suggests resistant  
250 bacteria arising in one geographical area can spread countrywide/worldwide either by direct  
251 exposure or through the food chain or climate change and the environment [6].



252 There was no significant relationship found in the present study between numbers of antibiotic  
253 resistance and virulence genes in plasmids ( $r = -0.25$ ,  $p > 0.05$ ), indicating acquisition of antibiotic  
254 resistance can induce the loss of virulence factors. Previous studies support this study finding [44],  
255 but does not agree with a study by Dionisio [45]. This discordance might be due to the fact that in  
256 other studies the relationship between resistance and virulence genes was determine at species level  
257 and were from gut and environmental samples [34].

## 258 **Limitations**

259 We acknowledge there are a number of limitations in the present study that warrant careful  
260 interpretation. Bioinformatics analysis was performed on Illumina short reads, which limited the  
261 ability to assemble completed plasmid genomes, and consequently the ability to ‘tease out’  
262 individual plasmids from assembled contigs. Assembly graphs were classified by Gplas+PlasFlow  
263 for plasmid prediction. As for any machine learning-based approach or indeed any method based on  
264 inference from similarity with known sequences, including tools such as PlasmidFinder, the  
265 predictive ability of the model is strongly dependent on the data in its reference database or training  
266 set. A bias toward plasmids in well-studied organisms is therefore likely.

## 267 **Conclusion**

268 There is a high proportion of isolates carrying resistance and virulence plasmids. This shows a  
269 significant concern of AMR development and spread in Tanzanian health settings and other LMIC  
270 settings. With limited resources and health service capacities, the increasing AMR trends are  
271 expected to high impact on bacterial-associated mortalities and morbidities.

## 272 **Acknowledgements**

273 The parent study whose data we analyzed in this study was funded by DANIDA with grant number  
274 DFC No. 12-007DTU. We would like to express our sincere gratitude to study participants whose  
275 specimens yielded the bacterial isolates analyzed.

## 276 **Authors' contributions**

277 LP, MvZ, HK, FMA and TS conceived the initial idea. LP, TS, KK and ES developed the study  
278 protocol. TS, MvZ and LP analyzed the data. LP wrote the first draft of the manuscript. TS, MvZ,  
279 KK, ES, HK and FM reviewed and edited drafts of the manuscript. LP, TS, MvZ, KK and ES, HK  
280 and FMA wrote the final Manuscript. All authors read and approved the final manuscript.

## 281 **Funding**

282 This study was supported by the Ifakara Health Institute (Training and Capacity Building  
283 Department) as part of the Master scholarship to Lameck Pashet Sengeruan. The funder and the  
284 data providers had no role in the design, analysis, interpretation of the results, and preparation of  
285 manuscript or decision to publish.

## 286 **Availability of data**

287 All relevant data are within the manuscript and its Supporting Information files.

## 288 **Consent for publication**

289 Not applicable

## 290 **References**

- 291 1. Dionisio F, Zilhão R, Alves J. Plasmid Interactions between plasmids and other mobile genetic  
292 elements affect their transmission and persistence ☆. 2019;102: 29–36.
- 293 2. Smillie C, Garcilla MP, Francia MV, Rocha EPC, Cruz F De. Mobility of Plasmids †. 2010;74:  
294 434–452. doi:10.1128/MMBR.00020-10
- 295 3. Brown SP, Cornforth DM, Mideo N. Evolution of virulence in opportunistic pathogens □:  
296 generalism , plasticity , and control §. Trends Microbiol. 2014;20: 336–342.  
297 doi:10.1016/j.tim.2012.04.005
- 298 4. Foley SL, Kaldhone PR, Ricke SC, Han J. Incompatibility Group II (IncII) Plasmids: Their  
299 Genetics, Biology, and Public Health Relevance. 2021;1.
- 300 5. Neill et al. TACKLING DRUG-RESISTANT INFECTIONS GLOBALLY □: FINAL REPORT  
301 AND RECOMMENDATIONS THE REVIEW ON. 2016.
- 302 6. Iskandar K, Molinier L, Hallit S, Sartelli M, Catena F, Coccolini F, et al. Drivers of Antibiotic  
303 Resistance Transmission in Low- and Middle-Income Countries from a “ One Health ”  
304 Perspective — A Review. 2020.
- 305 7. Sonda et al. Whole genome sequencing reveals high clonal diversity of Escherichia coli isolated

- 306 from patients in a tertiary care hospital in. 2018; 1–12.
- 307 8. Kumburu HH, Sonda T, Mmbaga BT, Alifrangis M, Lund O, Kibiki G, et al. Patterns of  
308 infections, aetiological agents and antimicrobial resistance at a tertiary care hospital in northern  
309 Tanzania. *Trop Med Int Heal*. 2017;22: 454–464. doi:10.1111/tmi.12836
- 310 9. Sonda T, Kumburu H, van Zwetselaar M, Alifrangis M, Mmbaga BT, Lund O, et al. Prevalence  
311 and risk factors for CTX-M gram-negative bacteria in hospitalized patients at a tertiary care  
312 hospital in Kilimanjaro, Tanzania. *Eur J Clin Microbiol Infect Dis*. 2018;37: 897–906.  
313 doi:10.1007/s10096-018-3196-8
- 314 10. Souvorov A, Agarwala R, Lipman DJ. Open Access SKESA<sup>2</sup>: strategic k-mer extension for  
315 scrupulous assemblies. 2018; 1–13.
- 316 11. Chaumeil P, Mussig AJ, Parks DH, Hugenholtz P. Genome analysis GTDB-Tk<sup>2</sup>: a toolkit to  
317 classify genomes with the Genome Taxonomy Database. 2020;36: 1925–1927.  
318 doi:10.1093/bioinformatics/btz848
- 319 12. Wick RR, Judd LM, Gorrie CL, Holt KE. Unicycler<sup>2</sup>: Resolving bacterial genome assemblies  
320 from short and long sequencing reads. 2017; 1–22. doi:10.1371/journal.pcbi.1005595
- 321 13. Arredondo-alonso S, Bootsma M, Rogers MRC, Corander J, Willems RJL, Schu AC. Genome  
322 analysis gplas<sup>2</sup>: a comprehensive tool for plasmid analysis using short-read graphs. 2020;36:  
323 3874–3876. doi:10.1093/bioinformatics/btaa233
- 324 14. Krawczyk PS, Lipinski L, Dziembowski A. PlasFlow<sup>2</sup>: predicting plasmid sequences in  
325 metagenomic data using genome signatures. 2018; 1–14. doi:10.1093/nar/gkx1321

- 326 15. Carattoli A, Zankari E, García-fernández A, Larsen V, Lund O, Villa L, et al. In Silico  
327 Detection and Typing of Plasmids using PlasmidFinder and Plasmid Multilocus Sequence  
328 Typing. 2014;58: 3895–3903. doi:10.1128/AAC.02412-14
- 329 16. Bortolaia V, Kaas RS, Ruppe E, Roberts MC, Schwarz S, Cattoir V, et al. ResFinder 4.0 for  
330 predictions of phenotypes from genotypes. J Antimicrob Chemother. 2020;75: 3491–3500.  
331 doi:10.1093/jac/dkaa345
- 332 17. Joensen KG, Scheutz F, Lund O, Hasman H, Kaas RS, Nielsen EM, et al. Real-time whole-  
333 genome sequencing for routine typing, surveillance, and outbreak detection of verotoxigenic  
334 Escherichia coli. J Clin Microbiol. 2014;52: 1501–1510. doi:10.1128/JCM.03617-13
- 335 18. Devi Y, Mathur P, Pragasam AK. Plasmid profiles among some ESKAPE pathogens in a  
336 tertiary care centre in south India. 2019. doi:10.4103/ijmr.IJMR
- 337 19. Sonda T, Kumburu H, Zwetselaar M Van, Alifrangis M, Lund O, Kibiki G, et al. Meta-analysis  
338 of proportion estimates of producing Enterobacteriaceae in East Africa hospitals. Antimicrob  
339 Resist Infect Control. 2016. doi:10.1186/s13756-016-0117-4
- 340 20. Malachowa N, Deleo FR. Mobile genetic elements of Staphylococcus aureus. 2010; 3057–3071.  
341 doi:10.1007/s00018-010-0389-4
- 342 21. Ramirez MS, Iriarte A, Reyes-Lamothe R, Sherratt DJ, Tolmasky ME. Small Klebsiella  
343 pneumoniae Plasmids: Neglected Contributors to Antibiotic Resistance. Front Microbiol.  
344 2019;10: 1–14. doi:10.3389/fmicb.2019.02182
- 345 22. Mordi RM, Momoh MI. Incidence of Proteus species in wound infections and their sensitivity

- 346 pattern in the University of Benin Teaching Hospital. 2009;8: 725–730.
- 347 23. Endimiani A, Luzzaro F, Brigante G, Perilli M, Lombardi G, Amicosante G, et al. *Proteus*  
348 *mirabilis* Bloodstream Infections: Risk Factors and Treatment Outcome Related to the  
349 Expression of. 2005;49: 2598–2605. doi:10.1128/AAC.49.7.2598
- 350 24. Tsakris A, Poulou A, Markou F, Pitiriga V, Piperaki ET, Kristo I, et al. Dissemination of  
351 clinical isolates of *Klebsiella oxytoca* harboring CMY-31, VIM-1, and a new OXY-2-type  
352 variant in the community. *Antimicrob Agents Chemother*. 2011;55: 3164–3168.  
353 doi:10.1128/AAC.00102-11
- 354 25. Boyd DA, Lefebvre B, Mataseje LF, Gagnon S, Roger M, Savard P, et al. *Enterobacter* sp. N18-  
355 03635 harbouring blaFRI-6 class A carbapenemase, Canada. *J Antimicrob Chemother*. 2020;75:  
356 486–488. doi:10.1093/jac/dkz438
- 357 26. Rodríguez-Medina N, Barrios-Camacho H, Duran-Bedolla J, Garza-Ramos U. *Klebsiella*  
358 *variicola*: an emerging pathogen in humans. *Emerg Microbes Infect*. 2019;8: 973–988.  
359 doi:10.1080/22221751.2019.1634981
- 360 27. Manter DK, Hunter WJ, Vivanco JM. *Enterobacter soli* sp. nov.: A lignin-degrading  $\gamma$ -  
361 *Proteobacteria* isolated from soil. *Curr Microbiol*. 2011;62: 1044–1049. doi:10.1007/s00284-  
362 010-9809-9
- 363 28. Bhassu S, brahim Eid II, Annie Tan GY. First report of *Enterobacter soli* associated with gastro-  
364 hepato infection of farmed fish, *Channa striata* in Malaysia. *Gastroenterol Hepatol Open Access*.  
365 2019;10: 61–65. doi:10.15406/ghoa.2019.10.00357

- 366 29. Kuo et al. Whole-Genome Sequence of the Soil Bacterium *Micrococcus* sp. KBS0714. 2017;5:  
367 23–24. Available: <http://arxiv.org/abs/1303.2223>
- 368 30. Dai H, Wang Y, Fang Y, Xiao T, Huang Z, Kan B, et al. *Proteus columbae* sp. nov., isolated  
369 from a pigeon in Ma'anshan, China. *Int J Syst Evol Microbiol*. 2018;68: 552–557.  
370 doi:10.1099/ijsem.0.002541
- 371 31. Potter et al. Population Structure, Antibiotic Resistance, and Uropathogenicity of. 2018;9: 1–17.
- 372 32. Jousset et al. False-Positive Carbapenem-Hydrolyzing Confirmatory Tests Due to ACT-28, a  
373 Chromosomally Encoded AmpC with Weak Carbapenemase Activity from *Enterobacter kobei*  
374 Agnè. 2019;63: 1–11.
- 375 33. Rodríguez-medina N, Barrios-camacho H, Duran- J, Garza-ramos U, Barrios-camacho H,  
376 Duran-bedolla J. *Klebsiella variicola*: an emerging pathogen in humans. 2019.  
377 doi:10.1080/22221751.2019.1634981
- 378 34. Beceiro A, Tomás M, Bou G. Antimicrobial resistance and virulence: A successful or  
379 deleterious association in the bacterial world? *Clin Microbiol Rev*. 2013;26: 185–230.  
380 doi:10.1128/CMR.00059-12
- 381 35. Cassiano I, Santos DO, Mattos R, Dutra M, Paula A, Carvalho-assef DA. Journal of Global  
382 Antimicrobial Resistance Draft genome sequence of KPC-2-producing *Pseudomonas*  
383 *aeruginosa* recovered from a bloodstream infection sample in Brazil. *Integr Med Res*. 2018;15:  
384 99–100. doi:10.1016/j.jgar.2018.08.021
- 385 36. Cerdeira LT, Lam MMC, Wyres KL, Ribas RM, Morais MM, Holt KE. Small IncQ1 and Col-

- 386 Like Plasmids Harboring blaKPC-2 and Non-Tn4401 Elements (NTEKPC-IIId) in High-Risk  
387 Lineages of *Klebsiella pneumoniae* CG258 Louise. 2019; 1–4.
- 388 37. Mcmillan EA, Jackson CR, Frye JG, Thomas CM, Mcmillan EA. Transferable Plasmids of  
389 *Salmonella enterica* Associated With Antibiotic Resistance Genes. 2020;11.  
390 doi:10.3389/fmicb.2020.562181
- 391 38. Erchia AMD, Pazzani C. A novel group of IncQ1 plasmids conferring multidrug resistance  
392 Oliva. *Plasmid*. 2016. doi:10.1016/j.plasmid.2016.11.005
- 393 39. Rawlings DE, Tietze E. Comparative Biology of IncQ and IncQ-Like Plasmids. 2001;65: 481–  
394 496. doi:10.1128/MMBR.65.4.481
- 395 40. Lima GJ De, Maria A, Scavuzzi L, Maria E, Beltrão B. Short Communication Identification of  
396 plasmid IncQ1 and NTE KPC -IIId harboring bla KPC-2 in isolates from *Klebsiella pneumoniae*  
397 infections in patients from Recife-PE , Brazil. 2020; 1–5. doi:10.1590/0037-8682-0526-2019
- 398 41. Xie M, Li R, Liu Z, Wai E, Chan C, Chen S. Recombination of plasmids in a carbapenem-  
399 resistant NDM-5-producing clinical *Escherichia coli* isolate. 2018; 1230–1234.  
400 doi:10.1093/jac/dkx540
- 401 42. Donnell GMC. Antiseptics and Disinfectants: Activity , Action , and Resistance. 1999;12:  
402 147–179.
- 403 43. Smalla K, Jechalke S, Top EM. HHS Public Access. 2015;3: 1–21.  
404 doi:10.1128/microbiolspec.PLAS-0038-2014.Plasmid
- 405 44. Pan Y, Zeng J, Li L, Yang J, Tang Z, Xiong W, et al. crossm Coexistence of Antibiotic



406 Resistance Genes and Virulence Factors Deciphered by Large-Scale Complete Genome

407 Analysis. 2020.

408 45. Dionisio F. Antibiotic Resistance Gene Diversity and Virulence Gene Microbiomes. 2019.

409
